# Supplementary material
Source: publisher site journal article supplement (https://www.dovepress.com/article/603986)
Supplement: Supplementary file 1 [file 603986_Supplementary%20Materials.docx]

**Supplement 1**

Skincare Routine Questionnaire (English Translation)

# 1. General

## 1.1 What is your gender?

- Male
- Female

## 1.2 What is your age?

- 24–30 years
- 31–40 years
- 41–50 years
- 51–60 years
- 61–70 years

## 1.3 Are you a dermatologist or a resident in dermatology?

- Dermatologist
- Resident (in training)

## 1.4 In which setting do you primarily work?

- University Medical Center (UMC)
- General hospital
- Private clinic
- Other

# 2. General questions on skincare routines and trends

We ask for your opinion on skincare routines as applied by healthy individuals aged 16–45 years. A ‘skincare routine’ refers to a structured set of actions or habits aimed at cleansing, hydrating, protecting and/or improving the condition of the skin. Typically, topical products are used, such as cleansers, moisturizers, sunscreen, or other skincare products.

## 2.1 Do you have concerns about the current skincare trend?

(Multiple answers possible)

- No
- Yes, due to potentially high costs for clients
- Yes, due to unrealistic expectations of products
- Yes, due to limited scientific evidence for some products
- Yes, due to increased risk of skin irritation when using multiple products
- Yes, due to risk of developing contact allergies
- Yes, due to use of products not suited to the skin type
- Yes, some products only provide very temporary effects (e.g. a “glow”)
- Yes, due to potential skin dryness caused by products such as scrubs
- Yes, other: ______

### 2.1.1 If “Yes, other”:

I am also concerned about: ______

## 2.2 Do you observe positive effects of the current skincare trend?

(Multiple answers possible)

- No
- Yes, increased awareness of skin health/skincare
- Yes, more attention to sun protection (SPF)
- Yes, treatment of skin conditions such as acne, xerosis, or skin ageing
- Yes, skincare is started at a younger age
- Yes, there is more openness to discussing skin conditions
- Yes, improved adherence to medical treatments
- Yes, simple skincare (such as retinoids) may prevent the need for more invasive cosmetic procedures
- Yes, other: ______

### 2.2.1 If “Yes, other”:

What other positive effects do you observe? ______

## 2.3 How do you perceive the current trend in skincare routines overall?

- Negative development
- Somewhat negative development
- Neutral
- Somewhat positive development
- Positive development

# 3. Steps per target group

A wide range of products is used in skincare routines, such as cleansers, serums, masks, and sunscreen, to optimally care for the skin.

## 3.1 Which steps do you generally recommend for a WOMAN (healthy skin, 25–40 years)?

(Multiple answers possible)

## 3.2 Which steps do you generally recommend for a MAN (healthy skin, 25–40 years)?

- Cleanser (removes dirt, sebum, and make-up)
- Moisturizer (hydration)
- Sunscreen (SPF)
- Exfoliant (AHA/BHA/PHA; removes dead skin cells)
- Toner (prepares the skin)
- Essence (light hydration with active ingredients)
- Serum (e.g. vitamin C, retinol, niacinamide)
- Facial oil (hydration)
- Overnight mask
- Sheet masks
- Facial massage/tools
- Mist/spray
- Lip care
- LED light therapy

## 3.3 What do you think is an acceptable MAXIMUM number of steps/products for a WOMAN (25–40 years)?

(Slider 0–20)

## 3.4 What do you think is an acceptable MAXIMUM number of steps/products for a MAN (25–40 years)?

(Slider 0–20)

## 3.5 What do you think is an acceptable MAXIMUM number of steps/products for someone with DRY SKIN?

(Slider 0–20)

# 4. Behaviour and clinical experience

## 4.1 Do you actively recommend a structured skincare routine to patients?

- Yes
- No

## 4.2 Do you see patients with skin complaints possibly caused by skincare?

(Multiple answers possible)

- No
- Yes, such as irritant eczema
- Yes, such as perioral dermatitis
- Yes, such as acne exogenica (due to occlusion)
- Yes, such as allergic contact dermatitis

### 4.2.1 How often do you see patients with complaints that are possibly caused by skincare?

- Very often (weekly)
- Regularly (monthly)
- Occasionally (<1× per month)
- Rarely (<1× per 3 months)

## 4.3 How often do you see patients with a damaged skin barrier due to overuse of active ingredients?

- Very often (weekly)
- Regularly (monthly)
- Occasionally (<1× per month)
- Rarely (<1× per 3 months)

## 4.4 Which active ingredients are most often associated with skin problems in your consultations?

(Multiple answers possible)

- Retinoids (e.g. retinol, tretinoin)
- Vitamin C
- AHAs (e.g. glycolic acid, lactic acid)
- BHAs (e.g. salicylic acid)
- Niacinamide
- Peptides
- Essential oils
- Fragrance/perfume
- Natural ingredients (e.g. tea tree oil)
- I rarely see complaints related to specific ingredients

# 5. Personal routine & perspective on trends

## 5.1 How much influence do influencers and social media have on skincare routines?

Slider 0–10 (0 = no influence, 10 = very strong influence)

## 5.2 How often do you encounter misconceptions about skincare, by for example social media or marketing claims?

- Very often (weekly)
- Regularly (monthly)
- Occasionally (<1× per month)
- Rarely (<1× per 3 months)

## 5.3 Which misconceptions have you encountered?

(Multiple answers possible)

- More products = better skin
- More expensive means better
- Quick results are achievable
- One product works for everyone
- Natural ingredients are always better
- Anti-ageing products can completely prevent wrinkles
- Other, namely: ______

### 5.3.1 If applicable: Which misconception do you frequently encounter?

______

## 5.4 Do you notice that younger individuals start extensive skincare earlier?

- Yes
- No

## 5.5 From what age can one start a simple skincare routine?

______ years

## 5.6 Do you think social media leads to incorrect self-treatment or delay in consulting a specialist?

- Yes, incorrect self-treatment
- Yes, delay in consultation
- No, neither

## 5.7 Do you personally follow a multi-step skincare routine?

- Yes
- No

**Supplement 2**

Vragenlijst Skin Care Routine (Nederlandse versie)

# 1. Algemeen

## 1.1 Wat is uw geslacht?

- Man
- Vrouw

## 1.2 Wat is uw leeftijd?

- 24–30 jaar
- 31–40 jaar
- 41–50 jaar
- 51–60 jaar
- 61–70 jaar

## 1.3 Bent u dermatoloog of in opleiding tot dermatoloog?

- Dermatoloog
- AIOS (in opleiding tot dermatoloog)

## 1.4 In welke setting bent u hoofdzakelijk werkzaam?

- UMC
- Perifeer ziekenhuis
- Privékliniek
- Anders

# 2. Algemene vragen skin care routines en huidverzorgingstrends

We vragen uw mening over skin care routines zoals deze bij gezonde personen tussen de 16 en 45 jaar worden toegepast. Onder een “skin care routine” verstaan we een gestructureerde reeks handelingen of gewoontes gericht op het reinigen, hydrateren, beschermen en/of verbeteren van de huidconditie. Hierbij worden doorgaans topische producten gebruikt, zoals reinigers, moisturizers, zonnebescherming of andere huidverzorgende middelen.

## 2.1 Heeft u zorgen over de huidige skin care trend?

(Meerdere antwoorden mogelijk)

- Nee
- Ja, vanwege de potentieel hoge kosten voor cliënten
- Ja, door te hoge verwachtingen van de producten
- Ja, wegens beperkt wetenschappelijk bewijs voor sommige producten
- Ja, door toegenomen kans op huidirritatie bij gebruik van meerdere producten
- Ja, door risico op het ontwikkelen van contactallergieën
- Ja, door gebruik van producten die niet passen bij het huidtype
- Ja, sommige producten geven slechts een zeer tijdelijk effect, zoals een “glow”
- Ja, wegens mogelijke uitdroging van de huid door gebruik van bijvoorbeeld scrubs
- Ja, anders, namelijk: ______

### 2.1.1 Indien “Ja, anders”: Ik maak me ook zorgen om:

______

## 2.2 Ziet u positieve effecten van de huidige skin care trend?

(Meerdere antwoorden mogelijk)

- Nee
- Ja, toegenomen bewustzijn over huidgezondheid/huidverzorging
- Ja, meer aandacht voor zonbescherming (SPF)
- Ja, behandeling van huidproblemen zoals acne, xerosis of huidveroudering
- Ja, huidverzorging begint op jongere leeftijd
- Ja, er is meer ruimte voor het bespreken van huidaandoeningen
- Ja, betere therapietrouw bij medische behandelingen
- Ja, door eenvoudige skin care (zoals retinoïden) kunnen ingrijpendere cosmetische behandelingen worden voorkomen
- Ja, anders, namelijk: ______

### 2.2.1 Indien “Ja, anders”: Wat vindt u nog meer positief aan de huidige skin care trend?

______

## 2.3 Hoe ziet u de huidige trend van skin care routines in het algemeen? Ik zie dit als een:

- Negatieve ontwikkeling
- Enigszins negatieve ontwikkeling
- Neutraal
- Enigszins positieve ontwikkeling
- Positieve ontwikkeling

# 3. Stappen per doelgroep

Er wordt een breed scala aan producten in skin care routine gebruikt, denk aan reinigers, serums, maskers en zonnebrandcrème, om de huid optimaal te verzorgen.

## 3.1 Welke stappen adviseert u doorgaans voor de skin care routine van een VROUW met een gezonde huid tussen de 25 en 40 jaar?

(Meerdere antwoorden mogelijk)

## 3.2 Welke stappen adviseert u doorgaans voor de skin care routine van een MAN met een gezonde huid tussen de 25 en 40 jaar?

(Meerdere antwoorden mogelijk)

- Reiniger (verwijderen vuil, talg en make-up)
- Hydratatie (moisturizer)
- Zonnebrandcrème (SPF)
- Exfoliant (AHA/BHA/PHA) (verwijderen dode huidcellen)
- Toner (voorbereiden verdere verzorging)
- Essence (mild hydrateren met actieve ingrediënten, populair in Koreaanse skin care)
- Serum (zoals vitamine C, retinol, niacinamide)
- Gezichtsolie (hydratatie)
- Overnight/slaapmasker (intensieve nachtverzorging)
- Sheet masks (geïmpregneerde gezichtsmaskers voor hydratatie)
- Gezichtsmassage/tools (doorbloeding stimuleren)
- Mist/spray (huid tussendoor hydrateren)
- Lipverzorging
- LED-lichttherapie (o.a. egalisatie/anti-ageing)

**3.3 Zoals u bij de vorige vraag zag zijn er veel verschillende stappen in een skin care routine mogelijk. Wat vindt u een acceptabel MAXIMAAL aantal stappen/producten in de skin care routine van een VROUW met een gezonde huid tussen de 25 en 40 jaar?**

(Slider 0–20)

## 3.4 Wat vindt u een acceptabel MAXIMAAL aantal stappen/producten in de skin care routine van een MAN met een gezonde huid tussen de 25 en 40 jaar?

(Slider 0–20)

## 3.5 Wat vindt u een acceptabel MAXIMAAL aantal stappen/producten in de skin care routine van iemand met een DROGE HUID?

(Slider 0–20)

# 4. Gedrag en ervaringen in de praktijk

## 4.1 Raadt u patiënten actief een gestructureerde skin care routine aan?

- Ja
- Nee

## 4.2 Ziet u patiënten met huidklachten die mogelijk zijn veroorzaakt door skin care? Denk hierbij aan het overmatig gebruik van retinoïden, zuren en niacinamide.

(Meerdere antwoorden mogelijk)

- Nee
- Ja, zoals irritatief eczeem
- Ja, zoals periorale dermatitis
- Ja, zoals acne exogenica (door occlusie)
- Ja, zoals contactallergisch eczeem

### 4.2.1 Hoe vaak ziet u patiënten met huidklachten die mogelijk veroorzaakt zijn door skin care?

- Zeer vaak (wekelijks)
- Regelmatig (maandelijks)
- Af en toe (<1x per maand)
- Zelden (<1x per 3 maanden)

## 4.3 Hoe vaak ziet u patiënten op uw poli met een beschadigde huidbarrière als gevolg van overmatig gebruik van actieve ingrediënten?

- Zeer vaak (wekelijks)
- Regelmatig (maandelijks)
- Af en toe (<1x per maand)
- Zelden (<1x per 3 maanden)

## 4.4 Welke actieve ingrediënten ziet u het vaakst terug in huidproblemen?

(Meerdere antwoorden mogelijk)

- Retinoïden (zoals retinol, tretinoïne)
- Vitamine C
- AHA’s (zoals glycolzuur, melkzuur)
- BHA’s (zoals salicylzuur)
- Niacinamide
- Peptiden
- Essentiële oliën
- Fragrance/parfum
- Natuurlijke ingrediënten (zoals tea tree oil)
- Ik zie zelden klachten door specifieke ingrediënten

# 5. Eigen routine & visie op trends

## 5.1 Hoeveel invloed denkt u dat influencers en sociale media hebben op skin care routines?

Slider 0–10 (0 = helemaal geen invloed, 10 = zeer veel invloed)

## 5.2 Hoe vaak komt u misvattingen over huidverzorging tegen in de praktijk, bijvoorbeeld door sociale media of marketingclaims?

- Zeer vaak (wekelijks)
- Regelmatig (maandelijks)
- Af en toe (<1x per maand)
- Zelden (<1x per 3 maanden)

## 5.3 Welke misvattingen bent u al tegengekomen?

(Meerdere antwoorden mogelijk)

- Meer producten = betere huid
- Duurder betekent beter
- Snelle resultaten zijn haalbaar
- Één product werkt voor iedereen
- Natuurlijke ingrediënten zijn altijd beter
- Anti-aging producten kunnen rimpels volledig voorkomen
- Ik kom deze opvallende misvatting ook vaak tegen, namelijk: ______

### 5.3.1 Indien van toepassing: Welke misvatting komt u vaak tegen?

______

## 5.4 Merkt u dat jongeren steeds eerder beginnen met uitgebreide huidverzorging?

- Ja
- Nee

## 5.5 Vanaf welke leeftijd vindt u dat men kan starten met een eenvoudige skin care routine?

______ jaar

## 5.6 Heeft u de indruk dat social media leidt tot verkeerde zelfbehandeling of uitstel van een consult bij een specialist?

- Ja, dit leidt tot verkeerde zelfbehandeling
- Ja, dit leidt tot uitstel van het consult
- Nee, beiden niet

## 5.7 Volgt u persoonlijk een skin care routine met meerdere stappen?

- Ja
- Nee
